# Supplementary material for: Effect of Regular Taekwondo Self-Defense Training on Oxidative Stress and Inflammation Markers in Postmenopausal Women
Source: MDPI journal article supplement (doi:10.3390/healthcare9080985), 2021-08-03
Supplement: s1 [file s1]

Taekwondo self-defense training program consists of 10 promised movements (No.1–10). The specific movement and description are as follows.

|                                                                                                                                                                                       |                                                                                                                                                                                                              |
|---------------------------------------------------------------------------------------------------------------------------------------------------------------------------------------|--------------------------------------------------------------------------------------------------------------------------------------------------------------------------------------------------------------|
| <p>No.1</p>  <p>Ready      Right sidestep<br/>Left hand knife outside<br/>block<br/>Middle punch</p> | <p>No.2</p>  <p>Ready      Right sidestep<br/>Left hand knife outside<br/>block<br/>Middle turn over punch</p>             |
| <p>No.3</p>  <p>Ready      Right sidestep<br/>Left hand knife outside<br/>block<br/>Upper punch</p> | <p>No.4</p>  <p>Ready      Right sidestep<br/>Left hand knife outside<br/>block<br/>Neck hand knife inside<br/>strike</p> |
| <p>No.5</p>                                                                                        | <p>No.6</p>                                                                                                              |

|                                                                                     |                                                                                                |                                                                                                             |
|-------------------------------------------------------------------------------------|------------------------------------------------------------------------------------------------|-------------------------------------------------------------------------------------------------------------|
| Ready                                                                               | Right sidestep<br>Left hand knife outside<br>block Forward strike to the<br>neck               | Right sidestep<br>Left hand palm heel block<br>Middle punch                                                 |
| No.7                                                                                |                                                                                                | No.8                                                                                                        |
|    |                                                                                                |                           |
| Ready                                                                               | Right sidestep<br>Left hand palm heel block<br>Right ridge hand strike                         | Ready<br>Right sidestep<br>Left hand palm heel<br>block<br>Upper punch                                      |
| No.9                                                                                |                                                                                                | No.10                                                                                                       |
|  |                                                                                                |                         |
| Ready                                                                               | Right sidestep<br>Left hand palm heel<br>pressing block<br>Elbow turning strike to the<br>face | Ready<br>Right sidestep<br>Left hand palm heel<br>pressing block<br>Palm heel forward strike<br>to the chin |

**Figure S1.** Taekwondo self-defense training program (one-step sparring).
